# Supplementary material for: Theoretical insights into photo-induced isomerization mechanisms of phenylsulfinyl radical PhSO˙
Source: Royal Society of Chemistry journal article supplement (doi:10.1039/d1cp05331k), 2022-01-01

**Supplementary Information**  
**for**  
**Theoretical Insights into Photo-induced Isomerization Mechanisms**  
**of Phenylsulfinyl Radical PhSO·**

Meng-Kai Liu, Jian Li, Quan-Song Li\*, Ze-Sheng Li\*

Key Laboratory of Cluster Science of Ministry of Education,  
Beijing Key Laboratory of Photoelectronic/Electrophotonic Conversion  
Materials, School of Chemistry and Chemical Engineering, Beijing  
Institute of Technology, Beijing 100081, China

Corresponding Authors

\*liquansong@bit.edu.cn (Q.-S. Li)

\*zeshengli@bit.edu.cn (Z.-S. Li)

## CONTENTS

|                                                                                                                                                    |     |
|----------------------------------------------------------------------------------------------------------------------------------------------------|-----|
| Table S1. TD-CAM-B3LYP vertical excitations at <b>1</b> -D <sub>0</sub> .....                                                                      | S3  |
| Table S2. TD- $\omega$ B97XD vertical excitations at <b>1</b> -D <sub>0</sub> .....                                                                | S4  |
| Table S3. Key structural data of radicals <b>1</b> and <b>2</b> at D <sub>0</sub> , D <sub>1</sub> , and D <sub>2</sub> states.....                | S5  |
| Table S4. MS-CASPT2 vertical excitations at <b>2</b> -D <sub>0</sub> .....                                                                         | S6  |
| Table S5. MS-CASPT2 vertical excitations at <b>Int1</b> -D <sub>0</sub> .....                                                                      | S7  |
| Table S6. MS-CASPT2 vertical excitations at <b>Int3</b> -D <sub>0</sub> .....                                                                      | S8  |
| Figure S1. Related orbitals of radicals <b>1</b> and <b>2</b> at D <sub>0</sub> , D <sub>1</sub> , and D <sub>2</sub> states.....                  | S9  |
| Figure S2. Electron localization of radicals <b>1</b> -D <sub>0</sub> and <b>2</b> -D <sub>0</sub> .....                                           | S10 |
| Figure S3. MS-CASPT2 energy plot from <b>1</b> -(D <sub>0</sub> /D <sub>1</sub> ) <sub>x</sub> to <b>2</b> -D <sub>0</sub> .....                   | S11 |
| Figure S4. MS-CASPT2 energy plot from <b>1</b> -(D <sub>0</sub> /D <sub>1</sub> ) <sub>x</sub> to <b>TS1</b> -D <sub>0</sub> .....                 | S12 |
| Figure S5. Related orbitals of <b>1</b> -(D <sub>0</sub> /D <sub>1</sub> ) <sub>x</sub> and <b>TS1</b> -D <sub>0</sub> .....                       | S13 |
| Figure S6. MS-CASPT2 energy plot from <b>2</b> -(D <sub>0</sub> /D <sub>1</sub> /D <sub>2</sub> ) <sub>x</sub> to <b>TS2</b> -D <sub>0</sub> ..... | S14 |
| Figure S7. MS-CASPT2 energy plot from <b>Int1</b> -(D <sub>0</sub> /D <sub>1</sub> ) <sub>x</sub> to <b>TS3</b> -D <sub>0</sub> .....              | S15 |
| Figure S8. MS-CASPT2 energy plot from <b>Int1</b> -(D <sub>0</sub> /D <sub>1</sub> ) <sub>x</sub> to <b>TS4</b> -D <sub>0</sub> .....              | S16 |
| Figure S9. MS-CASPT2//CASSCF energy profile for isomerization of <b>4</b> .....                                                                    | S17 |
| Molecular structures, energies and Cartesian coordinates of critical points.....                                                                   | S18 |

Table S1. Relative TD-CAM-B3LYP vertical excitation energy ( $\Delta E$ ), wavelength ( $\lambda$ ), configuration and oscillator strength ( $f$ ) with electron transition for D<sub>1</sub>, D<sub>2</sub>, and D<sub>3</sub> states by NTO analysis at 1-D<sub>0</sub>.

| State          | Configuration             | $E/eV$ | $\lambda/nm$ | $f$    |
|----------------|---------------------------|--------|--------------|--------|
| D <sub>0</sub> | $\pi^*(SOMO)$             | 0.00   | -            | -      |
| D <sub>1</sub> | $n_O \rightarrow \pi^*$   | 2.22   | 560          | 0.0006 |
| D <sub>2</sub> | $\pi_1 \rightarrow \pi^*$ | 3.38   | 375          | 0.0187 |
| D <sub>3</sub> | $\pi_2 \rightarrow \pi^*$ | 3.96   | 313          | 0.0022 |
| D <sub>4</sub> | -                         | 4.12   | 301          | 0.0765 |

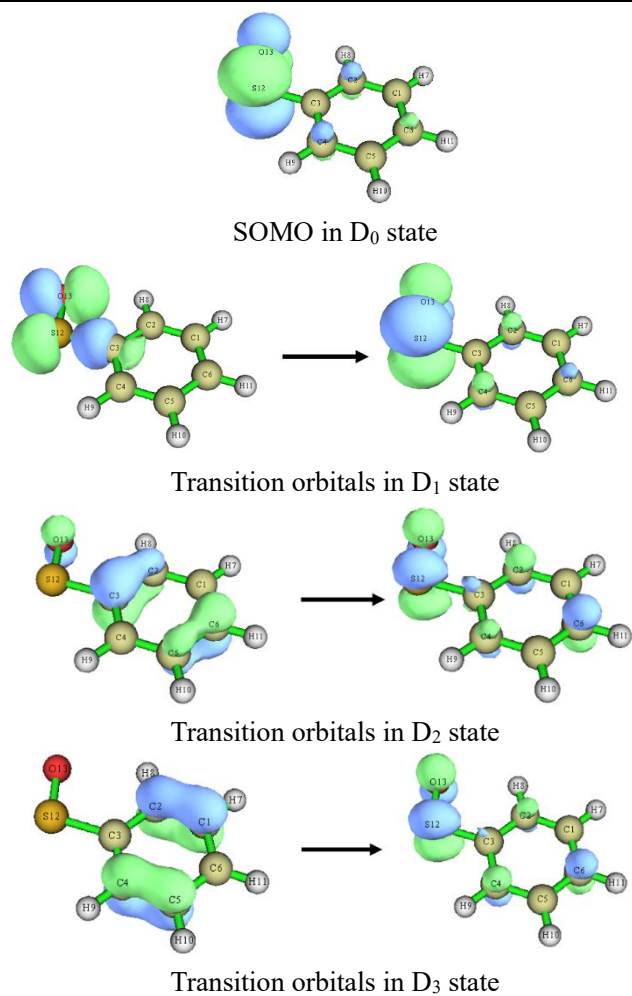

Table S2. Relative TD- $\omega$ B97XD vertical excitation energy ( $\Delta E$ ), wavelength ( $\lambda$ ), configuration and oscillator strength ( $f$ ) with electron transition for D<sub>1</sub>, D<sub>2</sub>, and D<sub>3</sub> states by NTO analysis at 1-D<sub>0</sub>.

| State          | Configuration             | $E/eV$ | $\lambda/nm$ | $f$    |
|----------------|---------------------------|--------|--------------|--------|
| D <sub>0</sub> | $\pi^*(SOMO)$             | 0.00   | -            | -      |
| D <sub>1</sub> | $n_O \rightarrow \pi^*$   | 2.19   | 567          | 0.0006 |
| D <sub>2</sub> | $\pi_1 \rightarrow \pi^*$ | 3.38   | 367          | 0.0237 |
| D <sub>3</sub> | $\pi_2 \rightarrow \pi^*$ | 3.94   | 314          | 0.0033 |
| D <sub>4</sub> | -                         | 4.20   | 295          | 0.0760 |

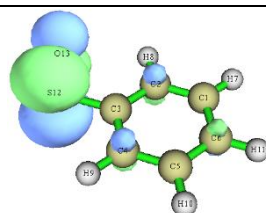

SOMO in D<sub>0</sub> state

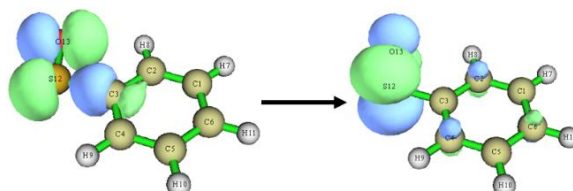

Transition orbitals in D<sub>1</sub> state

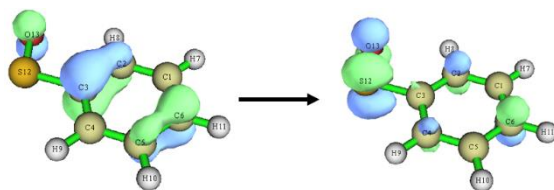

Transition orbitals in D<sub>2</sub> state

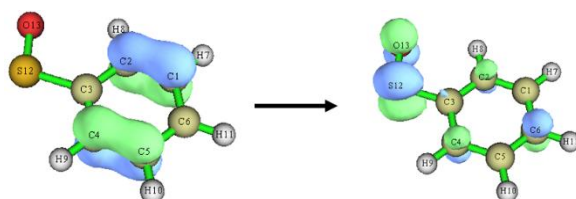

Transition orbitals in D<sub>3</sub> state

Table S3. Selected bond lengths (in Å), angles (in °), dihedral angles (in °), and fuzzy bond order of radicals **1** and **2** at D<sub>0</sub>, D<sub>1</sub>, and D<sub>2</sub> states.

|                        | Bond length |       |        |        |         | Angle      | Dihedral angle | Fuzzy bond order |        |        |
|------------------------|-------------|-------|--------|--------|---------|------------|----------------|------------------|--------|--------|
|                        | C1-C2       | C1-C6 | C1-S12 | C1-O12 | S12-O13 | C1-S12-O13 | C2-C1-S21-O13  | S12-O13          | C1-S12 | C1-O13 |
| <b>1-D<sub>0</sub></b> | 1.39        | 1.39  | 1.79   | -      | 1.54    | 108        | 180            | 2.22             | 1.14   | -      |
| <b>1-D<sub>1</sub></b> | 1.40        | 1.39  | 1.82   | -      | 1.75    | 94         | 91             | 1.79             | 1.13   | -      |
| <b>1-D<sub>2</sub></b> | 1.47        | 1.46  | 1.72   | -      | 1.55    | 109        | 180            | 2.05             | 1.34   | -      |
| <b>2-D<sub>0</sub></b> | 1.40        | 1.37  | -      | 1.41   | 1.67    | 121        | 179            | 1.16             | -      | 1.14   |
| <b>2-D<sub>1</sub></b> | 1.40        | 1.37  | -      | 1.39   | 1.70    | 120        | 179            | 1.12             | -      | 1.17   |
| <b>2-D<sub>2</sub></b> | 1.44        | 1.43  | -      | 1.29   | 1.94    | 117        | 180            | 0.90             | -      | 1.35   |

Table S4. MS-CASPT2 vertical excitation energy ( $E$ ) and wavelength ( $\lambda$ ) at 2-D<sub>0</sub>, together with the oscillator strength ( $f$ ), the main electronic configuration with weight in parentheses and the relative orbitals.

| State          | Configuration<br>(weight)          | $E/\text{eV}$ | $\lambda/\text{nm}$ | $f$    |
|----------------|------------------------------------|---------------|---------------------|--------|
| D <sub>0</sub> | $\pi_1^*$ (SOMO)                   | 0.00          | -                   | -      |
| D <sub>1</sub> | $n_s \rightarrow \pi_1^*$ (0.84)   | 0.53          | 2327                | 0.0000 |
| D <sub>2</sub> | $\pi_1 \rightarrow \pi_1^*$ (0.50) | 2.49          | 497                 | 0.0535 |
| D <sub>3</sub> | $\pi_2 \rightarrow \pi_1^*$ (0.42) | 3.47          | 358                 | 0.0272 |
| D <sub>4</sub> | $\pi_2 \rightarrow \pi_2^*$ (0.30) | 4.29          | 289                 | 0.0220 |

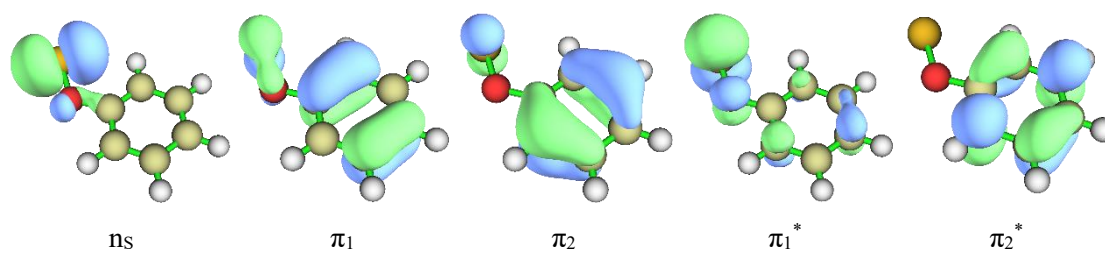

Table S5. MS-CASPT2 vertical excitation energy ( $E$ ) and wavelength ( $\lambda$ ) at **Int1-D<sub>0</sub>**, together with the oscillator strength ( $f$ ), the main electronic configuration with weight in parentheses and the relative orbitals.

| State          | Configuration<br>(weight)         | $E/eV$ | $\lambda/nm$ | $f$    |
|----------------|-----------------------------------|--------|--------------|--------|
| D <sub>0</sub> | n's (SOMO)                        | 0.00   | -            | -      |
| D <sub>1</sub> | n <sub>s</sub> →n's (0.76)        | 0.10   | 12430        | 0.0000 |
| D <sub>2</sub> | $\pi_1$ →n's (0.27)               | 1.75   | 709          | 0.0012 |
| D <sub>3</sub> | n <sub>s</sub> → $\pi_1^*$ (0.69) | 2.74   | 452          | 0.0000 |
| D <sub>4</sub> | $\pi_2$ →n's (0.27)               | 3.04   | 408          | 0.0026 |

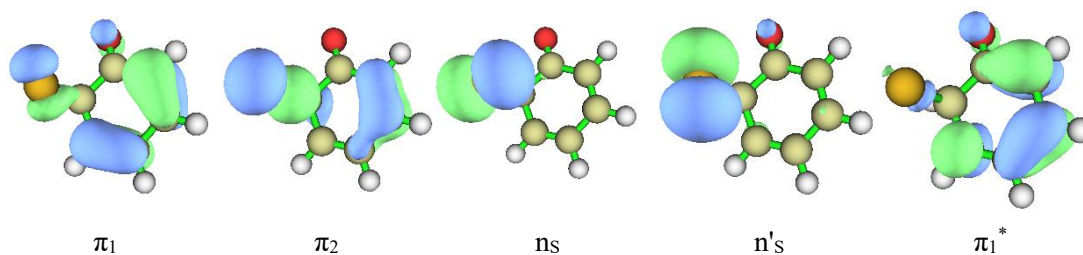

Table S6. MS-CASPT2 vertical excitation energy ( $E$ ) and wavelength ( $\lambda$ ) at **Int3-D<sub>0</sub>**, together with the oscillator strength ( $f$ ), the main electronic configuration with weight in parentheses and the relative orbitals.

| State          | Configuration<br>(weight)                                                  | $E/eV$ | $\lambda/nm$ | $f$    |
|----------------|----------------------------------------------------------------------------|--------|--------------|--------|
| D <sub>0</sub> | $\pi_1^*$ (SOMO)                                                           | 0.00   | -            | -      |
| D <sub>1</sub> | $\pi_1 \rightarrow \pi_1^*$ (0.31)<br>$\pi_1^* \rightarrow \pi_2^*$ (0.34) | 2.07   | 599          | 0.0009 |
| D <sub>2</sub> | $n_o \rightarrow \pi_1^*$ (0.62)                                           | 2.58   | 480          | 0.0002 |
| D <sub>3</sub> | $\pi_1 \rightarrow \pi_1^*$ (0.36)                                         | 3.05   | 406          | 0.0276 |
| D <sub>4</sub> | $\pi_2 \rightarrow \pi_1^*$ (0.34)                                         | 3.88   | 319          | 0.0091 |

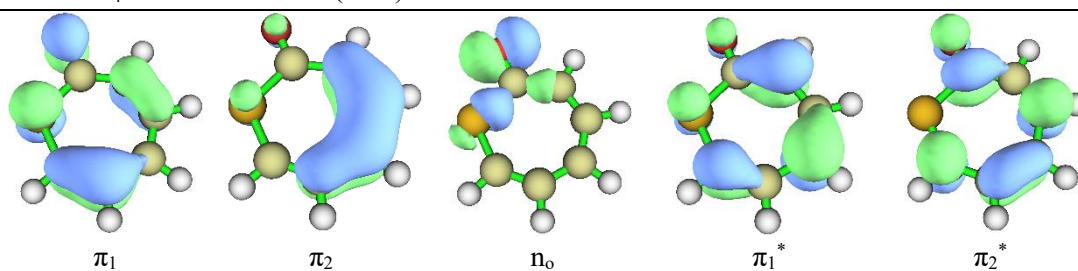



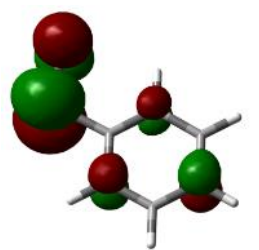

$\pi_{SO}^*$

SOMO of 1-D<sub>0</sub>

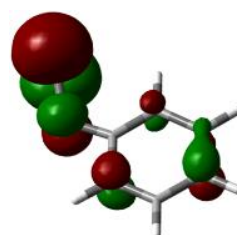

$\pi_{SO}^*$

SOMO of 2-D<sub>0</sub>

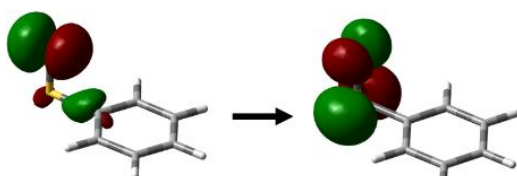

$n_O$

$\pi_{SO}^*$

Related orbitals of 1-D<sub>1</sub>

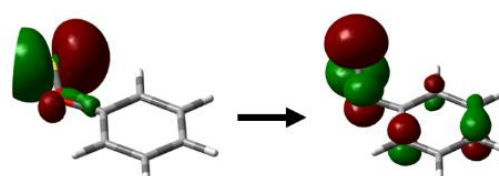

$n_S$

$\pi_{SO}^*$

Related orbitals of 2-D<sub>1</sub>

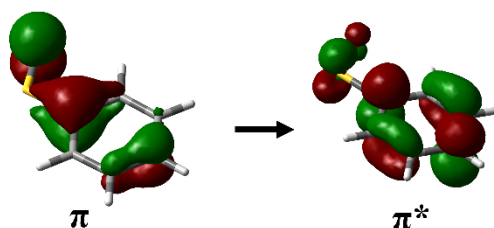

$\pi$

$\pi^*$

Related orbitals of 1-D<sub>2</sub>

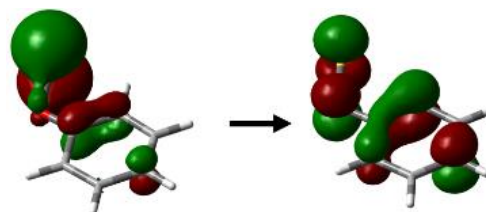

$\pi_{SO}$

$\pi_{SO}^*$

Related orbitals of 2-D<sub>2</sub>

Figure S1. Related orbitals of radicals **1** and **2** at D<sub>0</sub>, D<sub>1</sub>, and D<sub>2</sub> states.

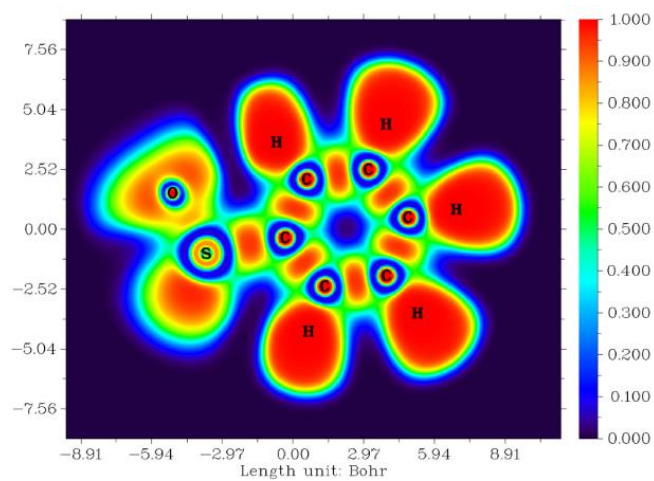

(a)

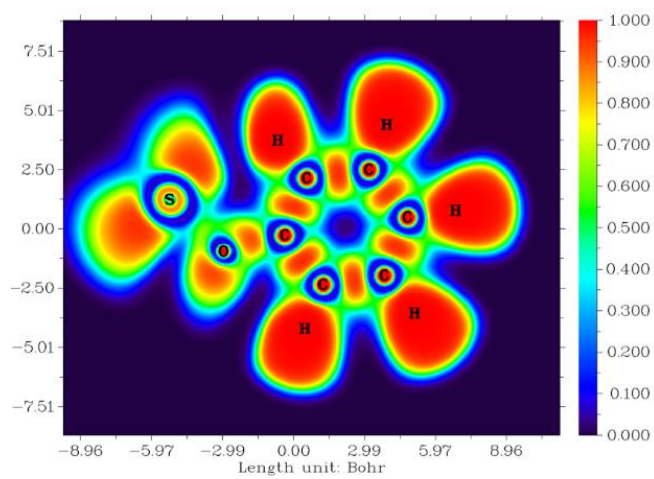

(b)

Figure S2. Electron localization of radicals (a) 1-D<sub>0</sub> and (b) 2-D<sub>0</sub>.

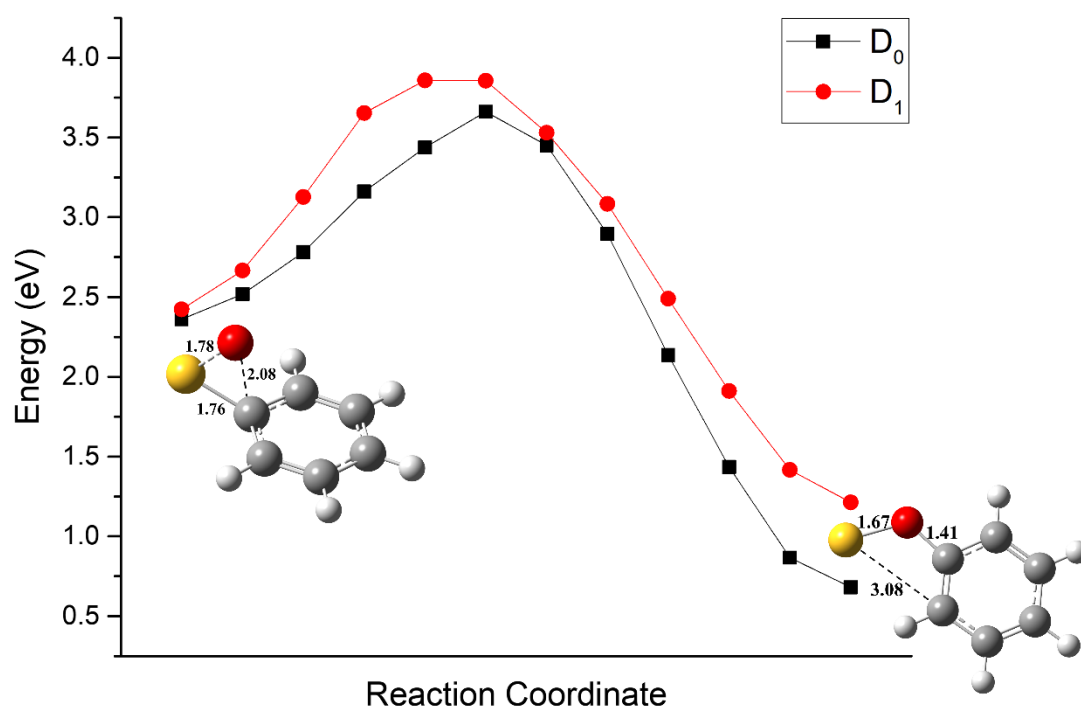

Figure S3. MS-CASPT2 energy plot from  $1-(D_0/D_1)_x$  to  $2-D_0$ . Bond lengths are given in Å.

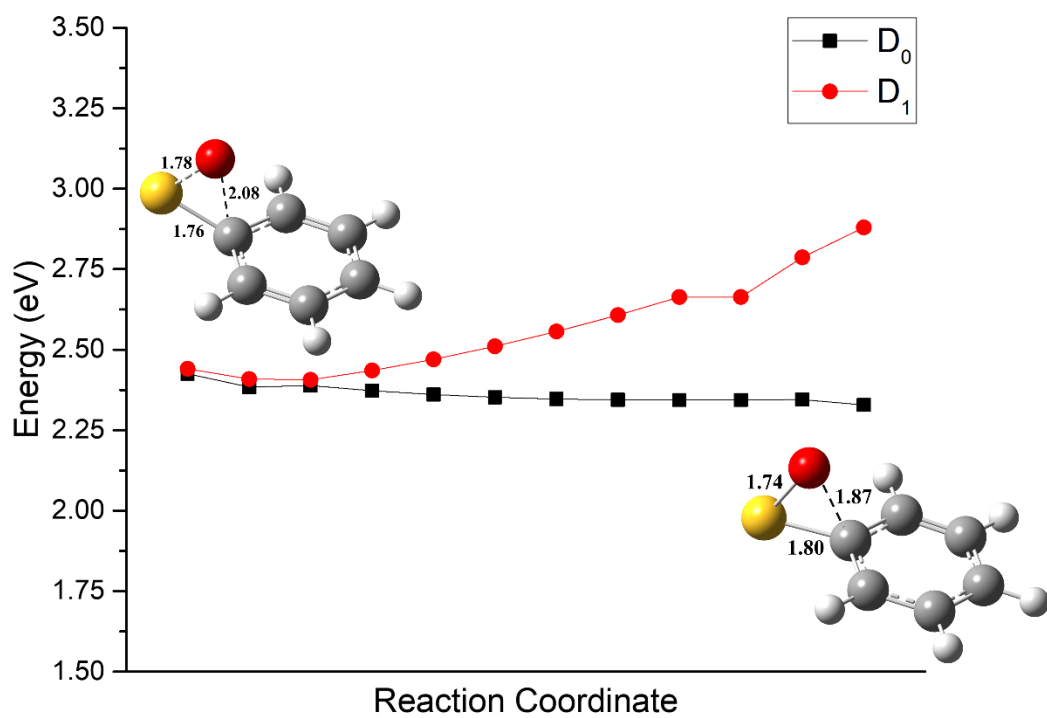

Figure S4. MS-CASPT2 energy plot from  $1-(D_0/D_1)_x$  to  $TS1-D_0$ . Bond lengths are given in Å.

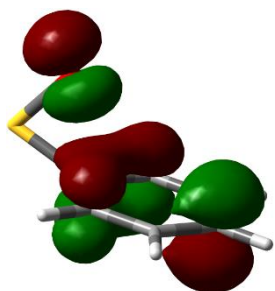

Orbital-1 of  $1-(D_0/D_1)_x$

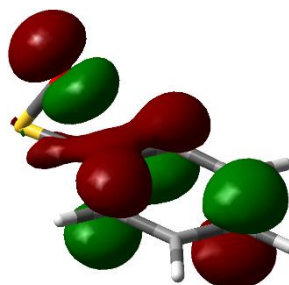

Orbital-1 of **TS1-D<sub>0</sub>**

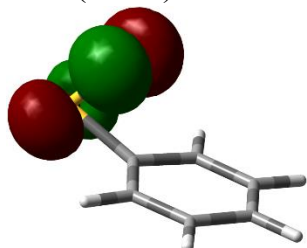

Orbital-2 of  $1-(D_0/D_1)_x$

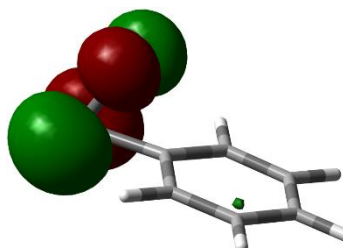

Orbital-2 of **TS1-D<sub>0</sub>**

Figure S5. Related orbitals of  $1-(D_0/D_1)_x$  and **TS1-D<sub>0</sub>**.

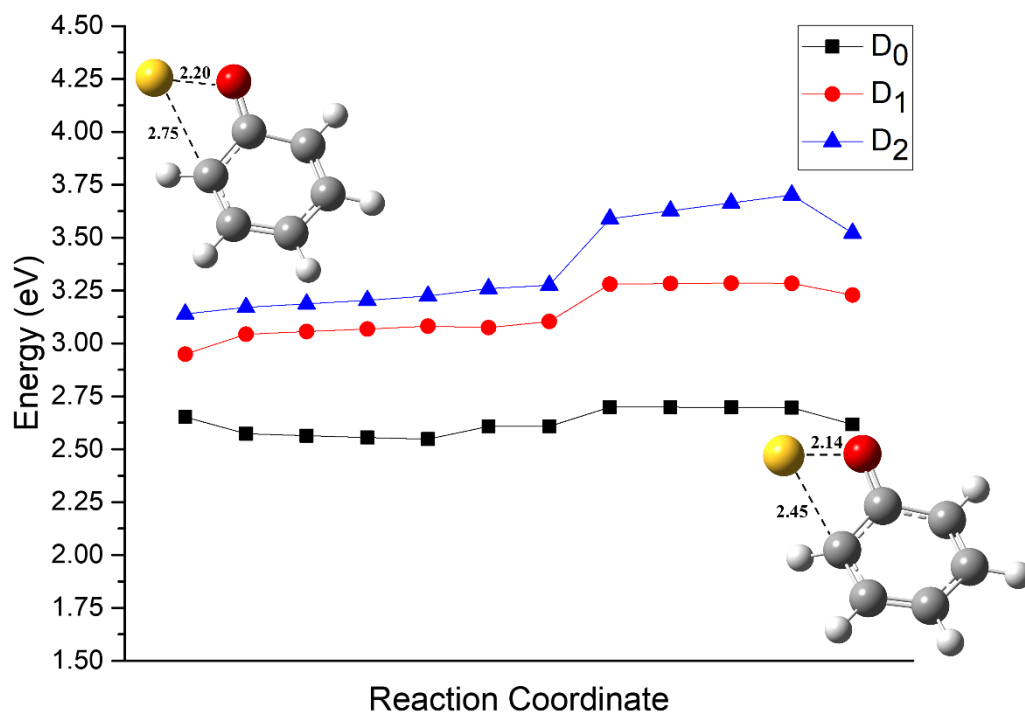

Figure S6. MS-CASPT2 energy plot from  $2-(D_0/D_1/D_2)_x$  to  $TS2-D_0$ . Bond lengths are given in Å.

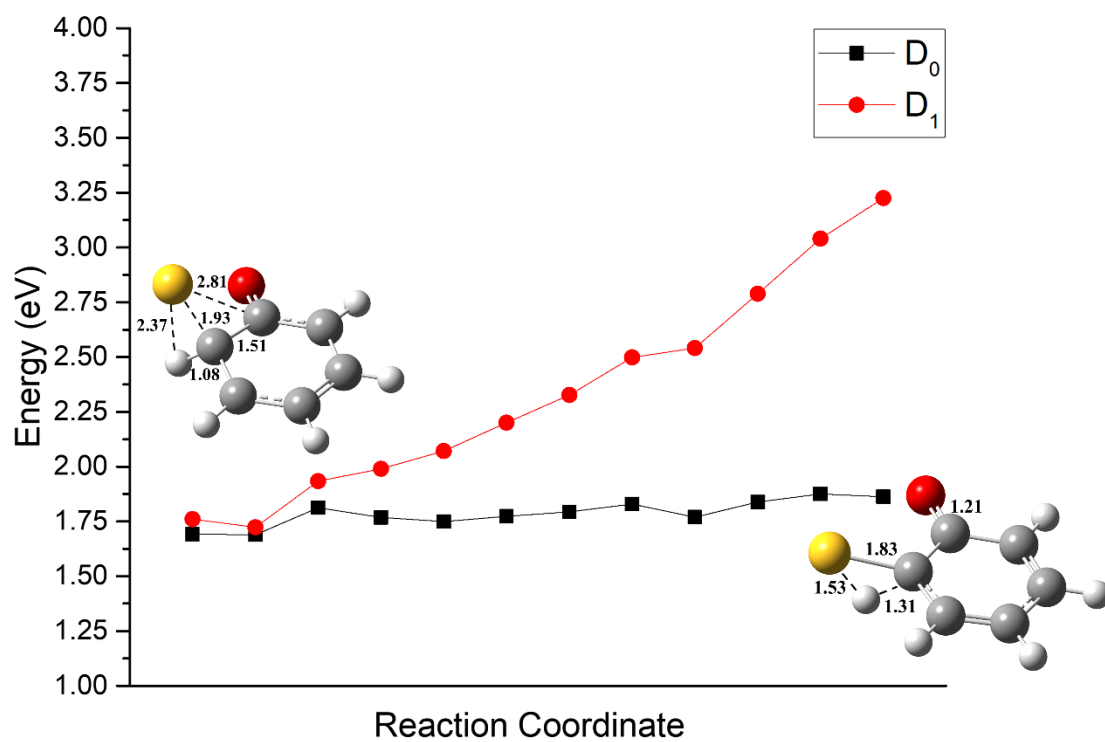

Figure S7. MS-CASPT2 energy plot from **Int1**-( $D_0/D_1$ )<sub>x</sub> to **TS3**- $D_0$ . Bond lengths are given in Å.

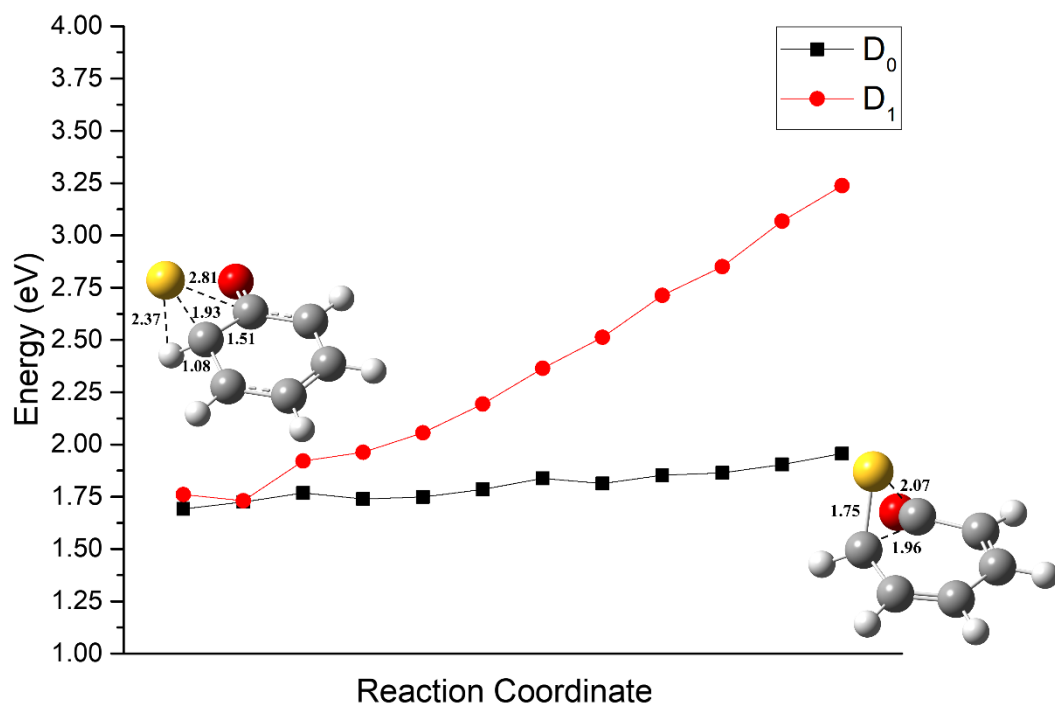

Figure S8. MS-CASPT2 energy plot from **Int1**-( $D_0/D_1$ )<sub>x</sub> to **TS4**- $D_0$ . Bond lengths are given in Å.



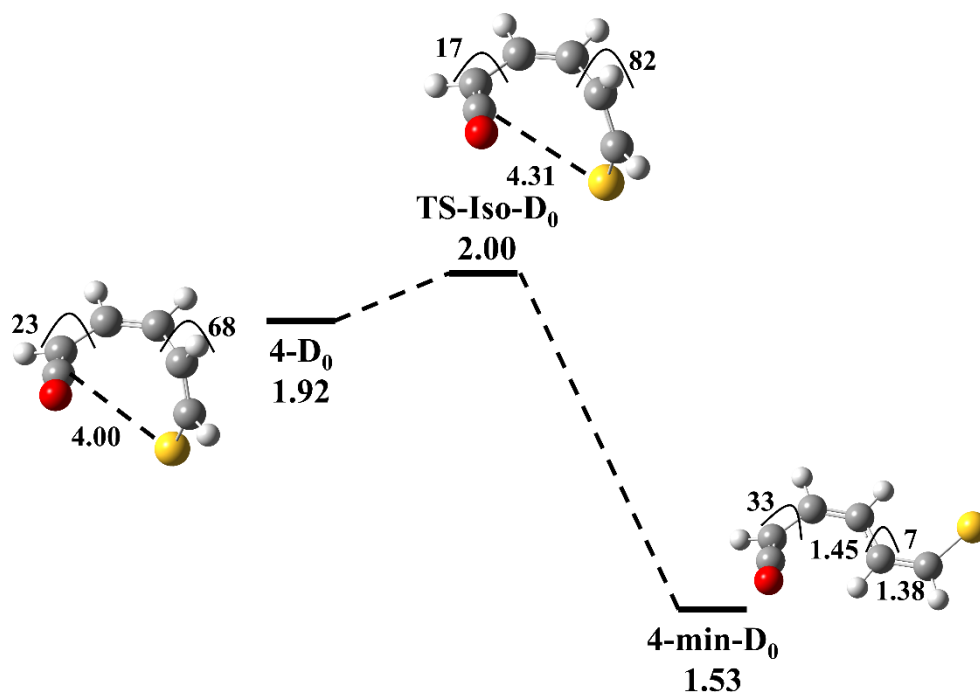

Figure S9. MS-CASPT2//CASSCF energy profile for isomerization of 4-D<sub>0</sub>. Energies are given in eV. Bond lengths are given in Å. Dihedral angles are given in °.

**Molecular structures, Cartesian coordinates, MS-CASPT2 absolute energies (in Hartree) and relative energies in parentheses (in eV) of critical points relative to 1-D<sub>0</sub>**

|                  |                     |           |           |
|------------------|---------------------|-----------|-----------|
| 1-D <sub>0</sub> | -703.9357090 (0.00) |           |           |
| C                | 1.693910            | 1.332507  | 0.000017  |
| C                | 0.321445            | 1.117741  | 0.000015  |
| C                | -0.159315           | -0.186540 | -0.000003 |
| C                | 0.719939            | -1.266914 | -0.000019 |
| C                | 2.088261            | -1.032434 | -0.000016 |
| C                | 2.570435            | 0.263198  | 0.000002  |
| H                | 2.072490            | 2.337703  | 0.000031  |
| H                | -0.366170           | 1.940991  | 0.000026  |
| H                | 0.345779            | -2.275118 | -0.000032 |
| H                | 2.770239            | -1.862194 | -0.000028 |
| H                | 3.630083            | 0.439638  | 0.000004  |
| S                | -1.915531           | -0.533965 | -0.000008 |
| O                | -2.663557           | 0.809654  | 0.000018  |

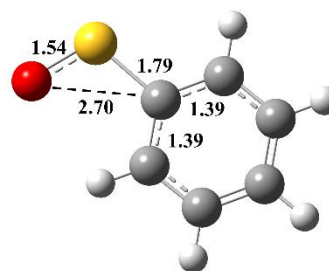

|                  |                     |           |           |
|------------------|---------------------|-----------|-----------|
| 1-D <sub>1</sub> | -703.8597261 (2.07) |           |           |
| C                | 1.749360            | 1.372818  | 0.133565  |
| C                | 0.381078            | 1.220878  | 0.334616  |
| C                | -0.178182           | -0.050808 | 0.291530  |
| C                | 0.622253            | -1.168010 | 0.049694  |
| C                | 1.983945            | -0.999419 | -0.149895 |
| C                | 2.540985            | 0.274183  | -0.107522 |
| H                | 2.184043            | 2.354517  | 0.165739  |
| H                | -0.242064           | 2.074563  | 0.519581  |
| H                | 0.180675            | -2.145529 | 0.019242  |
| H                | 2.606739            | -1.853922 | -0.337159 |
| H                | 3.596678            | 0.398927  | -0.263915 |
| S                | -1.972298           | -0.257419 | 0.524582  |
| O                | -2.345205           | -0.136509 | -1.180052 |

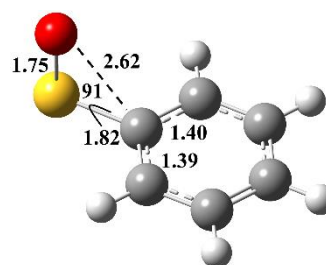

|                        |                     |           |           |
|------------------------|---------------------|-----------|-----------|
| <b>1-D<sub>2</sub></b> | -703.8359657 (2.71) |           |           |
| C                      | 1.811195            | 1.426491  | 0.306585  |
| C                      | 0.479036            | 1.395223  | 0.333242  |
| C                      | -0.230811           | 0.147731  | 0.043795  |
| C                      | 0.549655            | -1.059515 | -0.271211 |
| C                      | 1.902543            | -0.993483 | -0.290734 |
| C                      | 2.588027            | 0.248575  | -0.004281 |
| H                      | 2.328788            | 2.343918  | 0.519696  |
| H                      | -0.087801           | 2.278194  | 0.565694  |
| H                      | 0.021595            | -1.968303 | -0.479855 |
| H                      | 2.479959            | -1.868840 | -0.520126 |
| H                      | 3.657157            | 0.295117  | -0.022132 |
| S                      | -1.950390           | 0.134505  | 0.079633  |
| O                      | -2.440946           | -1.295344 | -0.260301 |

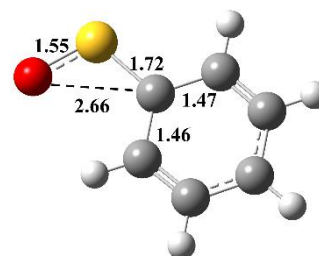

|                          |                     |           |           |
|--------------------------|---------------------|-----------|-----------|
| <b>TS1-D<sub>0</sub></b> | -703.8501445 (2.33) |           |           |
| C                        | -1.765485           | 1.214598  | -0.020672 |
| C                        | -0.381113           | 1.228532  | -0.122211 |
| C                        | 0.332904            | 0.004058  | -0.140785 |
| C                        | -0.396929           | -1.232538 | -0.112759 |
| C                        | -1.740721           | -1.215346 | -0.027783 |
| C                        | -2.454290           | 0.008218  | 0.021490  |
| H                        | -2.303956           | 2.143102  | 0.009509  |
| H                        | 0.165568            | 2.149815  | -0.155217 |
| H                        | 0.152630            | -2.152517 | -0.145236 |
| H                        | -2.285149           | -2.141215 | -0.002865 |
| H                        | -3.525071           | -0.001935 | 0.090240  |
| S                        | 2.109484            | -0.004220 | -0.413815 |
| O                        | 1.585114            | -0.000486 | 1.250293  |

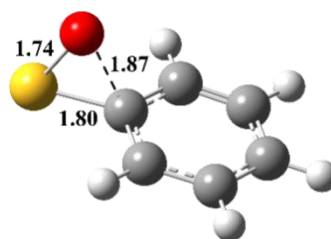

|                          |                     |           |           |
|--------------------------|---------------------|-----------|-----------|
| <b>TS1-D<sub>1</sub></b> | -703.8122369 (3.36) |           |           |
| C                        | -1.791197           | 1.189181  | -0.028180 |
| C                        | -0.405123           | 1.213564  | -0.021184 |
| C                        | 0.273903            | 0.005054  | -0.012273 |
| C                        | -0.400619           | -1.212043 | -0.017481 |
| C                        | -1.784344           | -1.196807 | -0.024863 |
| C                        | -2.488112           | 0.004397  | -0.034165 |
| H                        | -2.321519           | 2.123746  | -0.031787 |
| H                        | 0.127683            | 2.141500  | -0.011247 |
| H                        | 0.139846            | -2.135786 | -0.001909 |
| H                        | -2.314840           | -2.131030 | -0.025211 |
| H                        | -3.560168           | 0.003383  | -0.038412 |
| S                        | 2.245988            | 0.001100  | -0.567639 |
| O                        | 1.771487            | -0.006193 | 1.044540  |

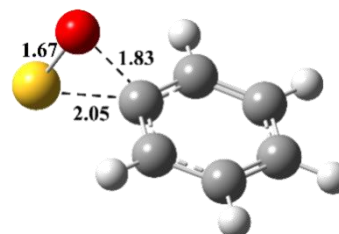

|                                                    |                            |           |           |
|----------------------------------------------------|----------------------------|-----------|-----------|
| <b>1-(D<sub>0</sub>/D<sub>1</sub>)<sub>x</sub></b> | <b>-703.8463087 (2.07)</b> |           |           |
| C                                                  | 0.009674                   | -0.027035 | 0.051858  |
| C                                                  | 0.001716                   | 0.133888  | 1.422066  |
| C                                                  | 1.218509                   | 0.194154  | 2.174348  |
| C                                                  | 2.431045                   | 0.148519  | 1.414549  |
| C                                                  | 2.421127                   | -0.011244 | 0.045549  |
| C                                                  | 1.214466                   | -0.115047 | -0.656356 |
| H                                                  | -0.928552                  | -0.076514 | -0.472459 |
| H                                                  | -0.948331                  | 0.227510  | 1.936167  |
| H                                                  | 3.382396                   | 0.259132  | 1.922709  |
| H                                                  | 3.357436                   | -0.049762 | -0.483150 |
| H                                                  | 1.213694                   | -0.234985 | -1.727433 |
| S                                                  | 1.235328                   | -0.140848 | 3.905124  |
| O                                                  | 1.230792                   | -1.703025 | 3.039941  |

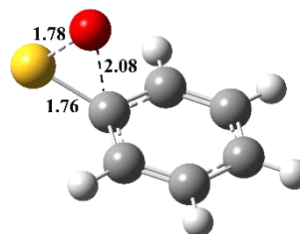

|                        |                            |           |           |
|------------------------|----------------------------|-----------|-----------|
| <b>2-D<sub>0</sub></b> | <b>-703.9106872 (0.68)</b> |           |           |
| C                      | 1.696025                   | 1.325411  | -0.000675 |
| C                      | 0.308777                   | 1.138133  | -0.004588 |
| C                      | -0.178823                  | -0.137753 | -0.004744 |
| C                      | 0.674924                   | -1.243113 | -0.001955 |
| C                      | 2.037151                   | -1.039519 | 0.001740  |
| C                      | 2.553741                   | 0.260935  | 0.002469  |
| H                      | 2.080664                   | 2.328418  | -0.000626 |
| H                      | -0.349249                  | 1.982354  | -0.007135 |
| H                      | 0.252670                   | -2.229368 | -0.002604 |
| H                      | 2.701130                   | -1.883538 | 0.004222  |
| H                      | 3.615814                   | 0.418728  | 0.005276  |
| S                      | -2.743288                  | 0.660327  | 0.020309  |
| O                      | -1.541526                  | -0.496748 | -0.011684 |

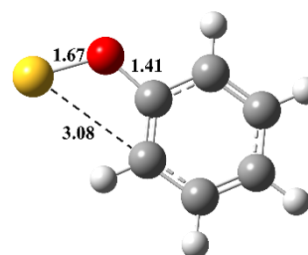

|                        |                            |           |           |
|------------------------|----------------------------|-----------|-----------|
| <b>2-D<sub>1</sub></b> | <b>-703.8911529 (1.21)</b> |           |           |
| C                      | 1.689551                   | 1.321582  | -0.000107 |
| C                      | 0.301067                   | 1.126205  | -0.003831 |
| C                      | -0.187577                  | -0.150872 | -0.004664 |
| C                      | 0.679198                   | -1.251805 | -0.001716 |
| C                      | 2.037573                   | -1.039630 | 0.000684  |
| C                      | 2.551976                   | 0.264872  | 0.001670  |
| H                      | 2.066992                   | 2.327397  | 0.000986  |
| H                      | -0.350354                  | 1.977580  | -0.008041 |
| H                      | 0.264164                   | -2.240976 | -0.001203 |
| H                      | 2.705283                   | -1.880915 | 0.003242  |
| H                      | 3.613119                   | 0.426496  | 0.004943  |
| S                      | -2.730654                  | 0.703917  | 0.018700  |
| O                      | -1.532328                  | -0.499582 | -0.010658 |

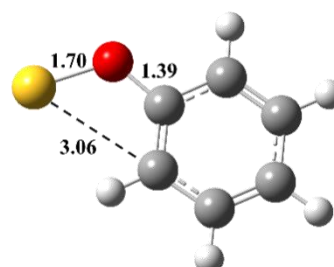

|                        |                     |           |           |
|------------------------|---------------------|-----------|-----------|
| <b>2-D<sub>2</sub></b> | -703.8387102 (2.64) |           |           |
| C                      | 1.664105            | 1.336563  | 0.000603  |
| C                      | 0.288281            | 1.124991  | 0.002240  |
| C                      | -0.212626           | -0.219717 | -0.001259 |
| C                      | 0.712233            | -1.325932 | 0.001183  |
| C                      | 2.051221            | -1.068193 | 0.001039  |
| C                      | 2.532233            | 0.276746  | -0.002265 |
| H                      | 2.039245            | 2.343112  | 0.001519  |
| H                      | -0.424102           | 1.926740  | 0.005682  |
| H                      | 0.310308            | -2.322898 | 0.000588  |
| H                      | 2.757384            | -1.877544 | 0.001155  |
| H                      | 3.595389            | 0.451332  | -0.004199 |
| S                      | -2.733515           | 0.956634  | -0.002984 |
| O                      | -1.472147           | -0.517563 | -0.003298 |

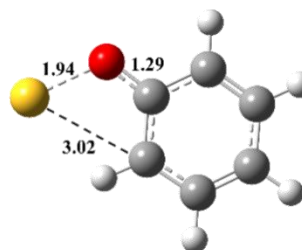

|                                                                  |                     |           |           |
|------------------------------------------------------------------|---------------------|-----------|-----------|
| <b>2-(D<sub>0</sub>/D<sub>1</sub>/D<sub>2</sub>)<sub>x</sub></b> | -703.8286474 (2.91) |           |           |
| C                                                                | -1.036057           | -1.486906 | 0.221058  |
| C                                                                | 0.094705            | -0.715104 | 0.563048  |
| C                                                                | 0.081691            | 0.696151  | 0.255463  |
| C                                                                | -1.202006           | 1.328463  | 0.016865  |
| C                                                                | -2.278774           | 0.551243  | -0.256445 |
| C                                                                | -2.191989           | -0.880755 | -0.220694 |
| H                                                                | -1.000675           | -2.550942 | 0.354848  |
| H                                                                | 0.842096            | -1.092731 | 1.226954  |
| H                                                                | -1.241307           | 2.399500  | -0.035017 |
| H                                                                | -3.217215           | 1.011454  | -0.505938 |
| H                                                                | -3.05706            | -1.465427 | -0.465460 |
| S                                                                | 2.662053            | -0.170334 | -0.259650 |
| O                                                                | 1.123616            | 1.364354  | 0.110044  |

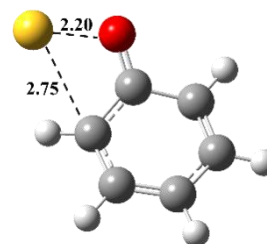

|                          |                     |           |           |
|--------------------------|---------------------|-----------|-----------|
| <b>TS2-D<sub>0</sub></b> | -703.8379542 (2.66) |           |           |
| C                        | -0.991996           | -1.488324 | 0.183461  |
| C                        | 0.143979            | -0.686226 | 0.528000  |
| C                        | 0.078277            | 0.720540  | 0.271684  |
| C                        | -1.196752           | 1.349094  | 0.051384  |
| C                        | -2.252318           | 0.546835  | -0.251653 |
| C                        | -2.147153           | -0.890023 | -0.220098 |
| H                        | -0.935985           | -2.553622 | 0.302340  |
| H                        | 0.768612            | -0.991267 | 1.344119  |
| H                        | -1.246896           | 2.418682  | -0.011224 |
| H                        | -3.189987           | 0.990086  | -0.531014 |
| H                        | -3.011562           | -1.478451 | -0.461769 |
| S                        | 2.410811            | -0.309083 | -0.333701 |
| O                        | 1.150040            | 1.360722  | 0.133549  |

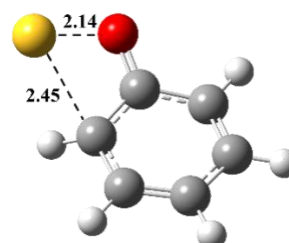

|                           |                     |           |           |
|---------------------------|---------------------|-----------|-----------|
| <b>Int1-D<sub>0</sub></b> | -703.8959854 (1.08) |           |           |
| C                         | -0.654250           | -1.403154 | 0.227548  |
| C                         | 0.475513            | -0.440809 | 0.449726  |
| C                         | 0.054123            | 1.014858  | 0.533260  |
| C                         | -1.243292           | 1.386356  | -0.068827 |
| C                         | -2.141254           | 0.440705  | -0.392220 |
| C                         | -1.857811           | -0.984958 | -0.190179 |
| H                         | -0.445940           | -2.447384 | 0.366427  |
| H                         | 1.047736            | -0.693078 | 1.329345  |
| H                         | -1.446283           | 2.434845  | -0.175803 |
| H                         | -3.098396           | 0.717618  | -0.793501 |
| H                         | -2.645130           | -1.692964 | -0.369338 |
| S                         | 1.641859            | -0.655893 | -1.018852 |
| O                         | 0.763420            | 1.828288  | 1.068045  |

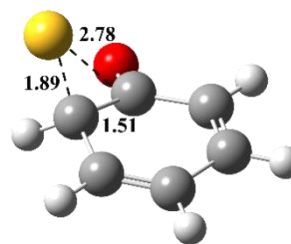

|                           |                     |           |           |
|---------------------------|---------------------|-----------|-----------|
| <b>Int1-D<sub>1</sub></b> | -703.8741756 (1.67) |           |           |
| C                         | -0.518031           | -1.271574 | 0.319357  |
| C                         | 0.517626            | -0.261875 | 0.556442  |
| C                         | 0.048140            | 1.170330  | 0.525750  |
| C                         | -1.255738           | 1.450085  | -0.032921 |
| C                         | -2.153028           | 0.390368  | -0.393858 |
| C                         | -1.805446           | -0.919876 | -0.219040 |
| H                         | -0.291607           | -2.294505 | 0.547442  |
| H                         | 1.143979            | -0.449657 | 1.411892  |
| H                         | -1.540330           | 2.478686  | -0.132751 |
| H                         | -3.115816           | 0.643064  | -0.794995 |
| H                         | -2.488995           | -1.704842 | -0.477643 |
| S                         | 1.533018            | -0.681997 | -1.005300 |
| O                         | 0.769486            | 2.054422  | 0.946865  |

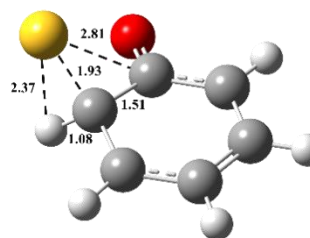

|                                                       |                     |           |           |
|-------------------------------------------------------|---------------------|-----------|-----------|
| <b>Int1-(D<sub>0</sub>/D<sub>1</sub>)<sub>x</sub></b> | -703.8722776 (1.73) |           |           |
| C                                                     | -0.559892           | -1.303468 | 0.264968  |
| C                                                     | 0.518012            | -0.310627 | 0.458790  |
| C                                                     | 0.048858            | 1.127391  | 0.472925  |
| C                                                     | -1.234404           | 1.433691  | -0.107662 |
| C                                                     | -2.205938           | 0.379570  | -0.374891 |
| C                                                     | -1.886415           | -0.916650 | -0.149966 |
| H                                                     | -0.338244           | -2.334334 | 0.443871  |
| H                                                     | 1.056436            | -0.513463 | 1.373564  |
| H                                                     | -1.492562           | 2.466528  | -0.229046 |
| H                                                     | -3.189562           | 0.653049  | -0.701899 |
| H                                                     | -2.621215           | -1.688736 | -0.281346 |
| S                                                     | 1.978621            | -0.394032 | -0.831213 |
| O                                                     | 0.769561            | 2.003709  | 0.913144  |

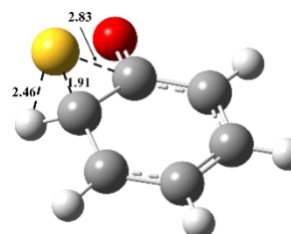

|                          |                     |           |           |
|--------------------------|---------------------|-----------|-----------|
| <b>TS3-D<sub>0</sub></b> | -703.8672622 (1.86) |           |           |
| C                        | -0.561790           | -1.272417 | 0.011768  |
| C                        | 0.445641            | -0.272146 | 0.222624  |
| C                        | 0.056632            | 1.164429  | 0.205349  |
| C                        | -1.368835           | 1.450874  | -0.012774 |
| C                        | -2.270181           | 0.462582  | -0.199296 |
| C                        | -1.864249           | -0.925379 | -0.187411 |
| H                        | -0.259013           | -2.301317 | 0.012080  |
| H                        | 1.139083            | -0.525393 | 1.304174  |
| H                        | -1.645807           | 2.487722  | -0.019979 |
| H                        | -3.305670           | 0.698347  | -0.358819 |
| H                        | -2.601686           | -1.688167 | -0.348856 |
| S                        | 2.220612            | -0.733863 | 0.245432  |
| O                        | 0.858519            | 2.057355  | 0.376947  |

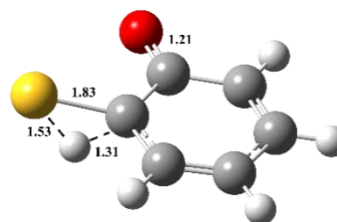

|                           |                     |           |           |
|---------------------------|---------------------|-----------|-----------|
| <b>Int2-D<sub>0</sub></b> | -703.9333160 (0.07) |           |           |
| C                         | -0.391213           | -1.460212 | 0.000028  |
| C                         | 0.443931            | -0.338849 | -0.000069 |
| C                         | -0.130167           | 1.005905  | 0.000203  |
| C                         | -1.591705           | 1.096363  | -0.000083 |
| C                         | -2.352584           | 0.002040  | 0.000027  |
| C                         | -1.763113           | -1.312456 | 0.000102  |
| H                         | 0.041149            | -2.443231 | -0.000002 |
| H                         | 2.462522            | 0.801156  | -0.000282 |
| H                         | -2.009286           | 2.085217  | -0.000240 |
| H                         | -3.423721           | 0.086626  | -0.000014 |
| H                         | -2.398621           | -2.176544 | 0.000159  |
| S                         | 2.219234            | -0.537082 | -0.000357 |
| O                         | 0.569010            | 2.010114  | -0.000032 |

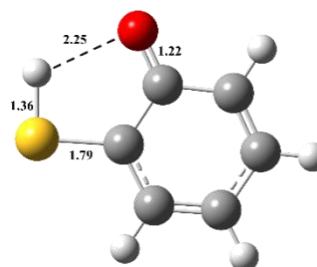

|                          |                     |           |           |
|--------------------------|---------------------|-----------|-----------|
| <b>TS5-D<sub>0</sub></b> | -703.9327145 (0.08) |           |           |
| C                        | 0.534803            | -1.499144 | -0.000193 |
| C                        | -0.419379           | -0.452527 | -0.000345 |
| C                        | 0.030473            | 0.924852  | 0.000014  |
| C                        | 1.444194            | 1.198708  | -0.000159 |
| C                        | 2.307266            | 0.174735  | -0.000219 |
| C                        | 1.866163            | -1.198450 | -0.000016 |
| H                        | 0.199142            | -2.517838 | 0.000257  |
| H                        | -1.881397           | 1.013428  | 0.000216  |
| H                        | 1.764570            | 2.222365  | -0.000208 |
| H                        | 3.363853            | 0.370850  | -0.000057 |
| H                        | 2.601576            | -1.979591 | 0.000222  |
| S                        | -2.155361           | -0.559016 | -0.000435 |
| O                        | -0.835593           | 1.824987  | 0.000740  |

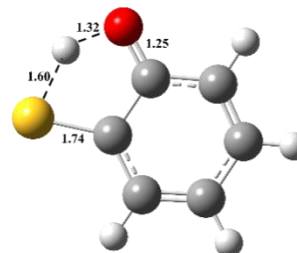

|                        |                      |           |           |
|------------------------|----------------------|-----------|-----------|
| <b>3-D<sub>0</sub></b> | -703.9560899 (-0.55) |           |           |
| C                      | -0.458486            | -1.477591 | 0.000074  |
| C                      | 0.447657             | -0.386636 | -0.000003 |
| C                      | -0.075006            | 0.925925  | -0.000031 |
| C                      | -1.453703            | 1.128833  | 0.000013  |
| C                      | -2.318250            | 0.045444  | 0.000085  |
| C                      | -1.819276            | -1.266734 | 0.000117  |
| H                      | -0.055904            | -2.471627 | 0.000095  |
| H                      | 1.620550             | 1.758440  | -0.000132 |
| H                      | -1.822454            | 2.136409  | -0.000014 |
| H                      | -3.378556            | 0.214964  | 0.000116  |
| H                      | -2.494495            | -2.101206 | 0.000173  |
| S                      | 2.175977             | -0.660925 | -0.000062 |
| O                      | 0.709627             | 2.013516  | -0.000105 |

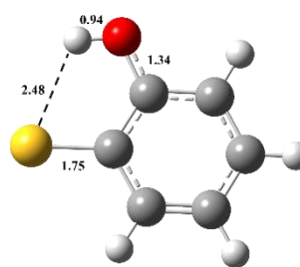

|                          |                     |           |           |
|--------------------------|---------------------|-----------|-----------|
| <b>TS4-D<sub>0</sub></b> | -703.8638149 (1.96) |           |           |
| C                        | -1.172722           | -1.256380 | 0.609729  |
| C                        | 0.276168            | -1.047960 | 0.639054  |
| C                        | 0.731887            | 0.812591  | 0.245306  |
| C                        | -0.450043           | 1.474191  | -0.334269 |
| C                        | -1.671500           | 0.925511  | -0.439643 |
| C                        | -2.043337           | -0.396054 | 0.050655  |
| H                        | -1.537045           | -2.150488 | 1.085796  |
| H                        | 0.801498            | -1.370169 | 1.519923  |
| H                        | -0.278640           | 2.496660  | -0.614970 |
| H                        | -2.457110           | 1.531929  | -0.851042 |
| H                        | -3.089255           | -0.640202 | 0.045590  |
| S                        | 1.246417            | -0.894624 | -0.809566 |
| O                        | 1.563980            | 1.326193  | 0.923406  |

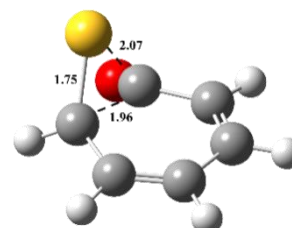

|                           |                     |           |           |
|---------------------------|---------------------|-----------|-----------|
| <b>Int3-D<sub>0</sub></b> | -703.9090995 (0.72) |           |           |
| C                         | 1.995418            | -0.617150 | -0.000075 |
| C                         | 0.961737            | -1.498722 | -0.000070 |
| C                         | -1.292202           | 0.386485  | 0.000105  |
| C                         | -0.421881           | 1.571149  | 0.000105  |
| C                         | 0.936811            | 1.723522  | 0.000067  |
| C                         | 2.007320            | 0.799553  | 0.000021  |
| H                         | 2.968762            | -1.075619 | -0.000156 |
| H                         | 1.196259            | -2.546916 | -0.000160 |
| H                         | -1.016512           | 2.465728  | 0.000090  |
| H                         | 1.255224            | 2.751265  | 0.000080  |
| H                         | 2.984690            | 1.244220  | 0.000019  |
| S                         | -0.788028           | -1.335504 | 0.000039  |
| O                         | -2.502228           | 0.537661  | -0.000219 |

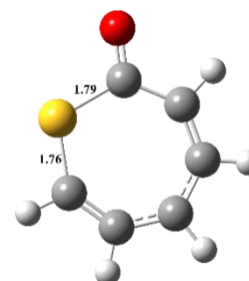



|                           |                     |           |           |
|---------------------------|---------------------|-----------|-----------|
| <b>Int3-D<sub>1</sub></b> | -703.8462028 (2.44) |           |           |
| C                         | -3.199869           | 0.139019  | 0.743764  |
| C                         | -2.879696           | -0.614584 | -0.314420 |
| C                         | -0.168075           | -0.509772 | 0.019054  |
| C                         | -0.118259           | 0.273561  | 1.095392  |
| C                         | -1.133677           | 0.318442  | 2.147698  |
| C                         | -2.450403           | 0.254973  | 2.003265  |
| H                         | -4.093754           | 0.737265  | 0.673385  |
| H                         | -3.481553           | -0.606917 | -1.202635 |
| H                         | 0.735783            | 0.913684  | 1.210479  |
| H                         | -0.752431           | 0.478235  | 3.141400  |
| H                         | -3.055455           | 0.361597  | 2.886590  |
| S                         | -1.479900           | -1.716485 | -0.353948 |
| O                         | 0.746249            | -0.545244 | -0.954957 |

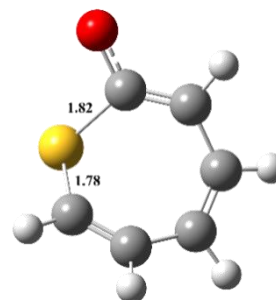

|                          |                     |           |           |
|--------------------------|---------------------|-----------|-----------|
| <b>TS6-D<sub>1</sub></b> | -703.8432896 (2.51) |           |           |
| C                        | -3.166761           | 0.158857  | 0.697631  |
| C                        | -2.856938           | -0.620917 | -0.358680 |
| C                        | 0.025953            | -0.384211 | 0.039360  |
| C                        | -0.087610           | 0.339484  | 1.162478  |
| C                        | -1.142207           | 0.273103  | 2.168508  |
| C                        | -2.453393           | 0.199298  | 1.984833  |
| H                        | -4.019479           | 0.814474  | 0.607592  |
| H                        | -3.419534           | -0.553660 | -1.270508 |
| H                        | 0.767344            | 0.939061  | 1.402995  |
| H                        | -0.799793           | 0.372858  | 3.183797  |
| H                        | -3.083466           | 0.231415  | 2.856332  |
| S                        | -1.560589           | -1.794640 | -0.303957 |
| O                        | 0.659240            | -0.488622 | -0.980516 |

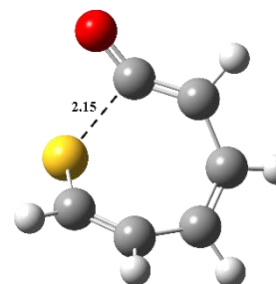

|                                                      |                     |           |           |
|------------------------------------------------------|---------------------|-----------|-----------|
| <b>TS6-(D<sub>0</sub>/D<sub>1</sub>)<sub>x</sub></b> | -703.8538703 (2.23) |           |           |
| C                                                    | -3.041974           | -0.015176 | 0.790759  |
| C                                                    | -2.976328           | -0.828621 | -0.278592 |
| C                                                    | 0.038478            | 0.091301  | 0.141429  |
| C                                                    | 0.085868            | 0.068711  | 1.464124  |
| C                                                    | -1.072555           | 0.138287  | 2.339546  |
| C                                                    | -2.360242           | 0.139483  | 2.073657  |
| H                                                    | -3.744162           | 0.783479  | 0.613205  |
| H                                                    | -3.543714           | -0.545877 | -1.145239 |
| H                                                    | 1.081650            | 0.124054  | 1.855464  |
| H                                                    | -0.807058           | 0.299438  | 3.368965  |
| H                                                    | -3.019078           | 0.371908  | 2.894517  |
| S                                                    | -2.115123           | -2.366537 | -0.493225 |
| O                                                    | 0.144411            | 0.172853  | -1.006652 |

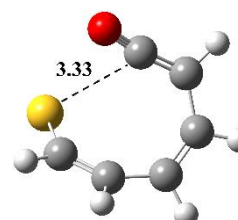

|                        |                     |           |           |
|------------------------|---------------------|-----------|-----------|
| <b>4-D<sub>0</sub></b> | -703.8650847 (1.92) |           |           |
| C                      | -3.074119           | -0.208890 | 0.636144  |
| C                      | -3.177857           | -1.486341 | 0.187388  |
| C                      | 0.000000            | 0.000000  | 0.000000  |
| C                      | 0.000000            | 0.000000  | 1.315101  |
| C                      | -1.145542           | 0.340088  | 2.172750  |
| C                      | -2.453423           | 0.258166  | 1.894900  |
| H                      | -3.545689           | 0.564463  | 0.009974  |
| H                      | -3.674429           | -1.652460 | -0.751170 |
| H                      | 0.948707            | -0.227617 | 1.762588  |
| H                      | -0.865473           | 0.711704  | 3.141592  |
| H                      | -3.142162           | 0.615475  | 2.641596  |
| S                      | -2.583337           | -2.888275 | 1.008367  |
| O                      | 0.024997            | 0.000000  | -1.139005 |

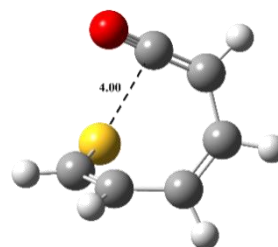

|                             |                     |           |           |
|-----------------------------|---------------------|-----------|-----------|
| <b>TS-Iso-D<sub>0</sub></b> | -703.8623462 (2.00) |           |           |
| C                           | -0.651653           | -0.412162 | 0.444694  |
| C                           | -0.147186           | 0.845494  | -0.098239 |
| C                           | 1.113809            | 1.243558  | -0.039967 |
| C                           | -1.969531           | -0.848095 | 0.388943  |
| C                           | 2.230947            | 0.500011  | 0.612042  |
| C                           | 3.049454            | -0.262422 | -0.055084 |
| H                           | 0.054688            | -1.060424 | 0.928796  |
| H                           | -0.863470           | 1.488906  | -0.572972 |
| H                           | 1.360782            | 2.199901  | -0.467588 |
| H                           | 2.447642            | 0.622411  | 1.657558  |
| H                           | -2.194973           | -1.820831 | 0.842845  |
| O                           | 3.760788            | -0.934540 | -0.631390 |
| S                           | -3.300319           | 0.005130  | -0.336939 |

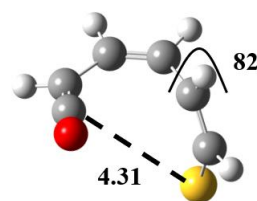

|                            |                     |           |           |
|----------------------------|---------------------|-----------|-----------|
| <b>4-min-D<sub>0</sub></b> | -703.8796453 (1.53) |           |           |
| C                          | -0.221733           | 2.184075  | 1.860004  |
| C                          | 0.162468            | 1.043975  | 2.388428  |
| C                          | -0.545918           | 3.179688  | 1.407599  |
| C                          | -0.531801           | -0.243455 | 2.211334  |
| C                          | -1.127212           | -0.740547 | 1.084363  |
| C                          | -1.134135           | -0.111044 | -0.217903 |
| H                          | -1.796895           | -0.564787 | -1.333947 |
| H                          | 0.996235            | 1.114377  | 3.061514  |
| H                          | -0.561938           | -0.855268 | 3.094311  |
| H                          | -1.619988           | -1.689491 | 1.170182  |
| H                          | -0.549137           | 0.781603  | -0.347809 |
| O                          | -1.681556           | 0.002993  | -2.239286 |
| S                          | -2.794039           | -1.950937 | -1.419418 |

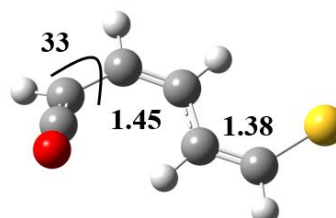

Supplement: d1cp05331k1.pdf [file d1cp05331k1.pdf]
